# Supplementary material for: Simple, Low-cost and Semi-permanent Film for Virus Inactivation Using Avian Coronavirus Model as Challenge
Source: Preprints.org preprint supplement (doi:10.20944/preprints202008.0410.v1), 2020-08-19
Supplement: Supplementary file 2 [file supplementary]

**Supplementary material 1.** The p values from comparisons between experimental groups (film + challenge and respective positive control group) for Log10 ACoV RNA copies and qualitative results (virus isolation and RT-qPCR).

|  | **Parameter** | **Hands** | **Inanimate surface** |
| --- | --- | --- | --- |
| **High challenge** | RT-qPCR (quantitative) | 0.0041 | 0.0028 |
|  | Virus isolation | 0.0152 | 0.0022 |
|  | RT-qPCR (qualitative) | 0.0022 | 0.0022 |
| **Intermediate challenge** | RT-qPCR (quantitative) | 0.0028 | 0.0021 |
|  | Virus isolation | 0.0022 | 0.0152 |
|  | RT-qPCR (qualitative) | 0.0022 | 0.0022 |
| **Low challenge** | RT-qPCR (quantitative) | 0.0021 | 0.0015 |
|  | Virus isolation | 0.0152 | 0.0013 |
|  | RT-qPCR (qualitative) | 0.0022 | 0.0025 |
